1 Thermal niche evolution across replicated *Anolis* lizard adaptive radiations

2 Alex R. Gunderson<sup>†\*</sup>, D. Luke Mahler<sup>§</sup>, and Manuel Leal<sup>¶</sup>

3

4 <sup>†</sup>Department of Environmental Science, Policy, and Management, University of California, Berkeley,

5 California 94720-3140

6 \*Corresponding author: e-mail: alexrgunderson@gmail.com

7 <sup>§</sup>Department of Ecology and Evolutionary Biology, University of Toronto, Toronto, Ontario, M5S 3B2

8 CA

9 <sup>¶</sup>Division of Biological Sciences, University of Missouri, 105 Tucker Hall, Columbia, MO 65211.

10

11 Running title: Physiology of adaptive radiation

12

13 Keywords: *Anolis*, thermal biology, physiology, thermal tolerance, thermal performance, evolutionary

14 rates, sympatry, species richness

15

16

17 Data accessibility: If accepted, data herein will be archived at Dryad (<http://datadryad.org>)

18

19

20

21

22

23

24

25

26

27 **Abstract**

28 Elucidating how ecological and evolutionary mechanisms interact to produce and maintain biodiversity is  
29 a fundamental problem in evolutionary ecology. We investigate this issue by focusing on how  
30 physiological evolution affects performance and species coexistence along the thermal niche axis in  
31 replicated radiations of *Anolis* lizards, groups best known for resource partitioning based on  
32 morphological divergence. We find repeated divergence in thermal physiology within these radiations,  
33 and that this divergence significantly affects performance within natural thermal environments.  
34 Morphologically similar species that co-occur invariably differ in their thermal physiology, providing  
35 evidence that physiological divergence facilitates species co-existence within anole communities. Despite  
36 repeated divergence in traits of demonstrable ecological importance, phylogenetic comparative analyses  
37 indicate that physiological traits have evolved more slowly than key morphological traits related to the  
38 structural niche. Phylogenetic analyses also reveal that physiological divergence is correlated with  
39 divergence in broad-scale habitat climatic features commonly used to estimate thermal niche evolution,  
40 but that the latter incompletely predicts variation in the former. We provide comprehensive evidence for  
41 repeated adaptive evolution of physiological divergence within *Anolis* adaptive radiations, including the  
42 complementary roles of physiological and morphological divergence in promoting community-level  
43 diversity. We recommend greater integration of performance-based traits into analyses of climatic niche  
44 evolution, as they facilitate a more complete understanding of the phenotypic and ecological  
45 consequences of climatic divergence.

46

47

48

49

50

51

52

53 *Introduction*

54 A mechanistic understanding of how divergent phenotypic evolution facilitates species coexistence is a  
55 fundamental problem in ecology and evolution [1]. This problem comes into particular focus in the study  
56 of adaptive radiation, a process for which a hallmark is the repeated evolution of niche differences that  
57 allow closely related species to partition resources and stably co-occur [2-4]. Traditionally, most research  
58 on trait evolution during adaptive radiation has focused on morphological traits associated with dietary  
59 resource acquisition or structural habitat use, due to the clear role such adaptations play in mediating  
60 competition and facilitating coexistence [3, 5-7]. Physiological adaptation to abiotic conditions has  
61 received comparatively less attention in adaptive radiation studies, particularly in animals [3, 8]. Such  
62 adaptations are more typically studied for their role in generating divergence among geographically  
63 disjunct lineages experiencing different climates [9, 10]. However, physiological divergence can also play  
64 an important role in adaptive radiation by facilitating fine-scale partitioning of the local climatic niche  
65 [11], providing an additional resource axis along which a radiating clade may diversify [12, 13]. Indeed,  
66 such abiotic niche divergence has been hypothesized to underlie many impressive radiations, including  
67 bolitoglossine salamanders [14, 15], *Liolaemus* lizards [16-18], *Drosophila* flies [19], *Petrolisthes* crabs  
68 [20] and lake whitefish [21].

69         If physiological adaptation to abiotic conditions contributes to adaptive radiation, physiological  
70 divergence should affect performance in the different abiotic regimes that species occupy. Therefore,  
71 knowledge of both physiological traits related to the fundamental abiotic niche (broadly, the range of  
72 conditions a species could occupy) and abiotic conditions (at scales appropriate for the organisms under  
73 study [22]) are required to make the important phenotype-to-performance linkages established for many  
74 classic adaptive radiations driven by morphological divergence [3, 5, 23]. Despite the power of  
75 performance-based analyses, one of most common tools applied in recent investigations of abiotic niche  
76 divergence is correlative ecological niche modeling (ENM), which estimates species' realized niches (*i.e.*,  
77 the range of conditions that species occupy) using information about species occurrences and broad-scale  
78 climate conditions [24-28]. Though correlative ENMs are powerful for addressing many questions, they

79 also have characteristics that limit the inferences that can be made from their application [29-34]. In  
80 particular, correlative ENMs provide no information about phenotypic traits (physiological or otherwise)  
81 linked to performance [30]. Additionally, ENMs are limited in their ability to elucidate the role of abiotic  
82 niche divergence in coexistence, as they do not provide fine-scale information about microclimate use.  
83 Such factors can be of paramount importance for coexistence in radiating clades, as species with identical  
84 or largely overlapping ranges may be able to partition resources via adaptation to different  
85 microenvironments [11, 35].

86 Here, we investigate the contribution of thermal niche divergence to the replicated *Anolis* lizard  
87 adaptive radiations of Puerto Rico and Jamaica by analyzing patterns and performance consequences of  
88 physiological divergence across 16 species (Fig. 1). Greater Antillean *Anolis* are best known for  
89 morphological diversification along the fundamental structural niche axis [36-38], but morphological  
90 evolution cannot fully explain the patterns of divergence and community composition observed across the  
91 Greater Antilles [23]. Divergence in the thermal niche is also proposed to be an important component of  
92 *Anolis* diversification based primarily on realized niche estimates from natural history and ENM studies  
93 [12, 13, 24, 39-44]. However, we still know little about how physiology evolves during realized niche  
94 divergence [45] and the extent to which physiological evolution facilitates species co-existence.

95 We first use data from the Puerto Rican *crisatellus* species group to investigate repeated  
96 divergence in thermal physiology and performance between species that occupy distinct thermal  
97 environments. Next, we integrate these data with measurements of operative thermal conditions in Puerto  
98 Rico to explore the performance consequences of physiological divergence. We then consider spatial  
99 patterns of physiological variation to evaluate the contribution of physiological evolution to fine-scale  
100 niche partitioning and community-level species co-existence across Puerto Rico and Jamaica. Finally, we  
101 conduct phylogenetic analyses of rates of physiological and morphological evolution to compare the pace  
102 of disparification between traits associated with the fundamental thermal niche and the fundamental  
103 structural niche, and we employ phylogenetic methods to estimate the strength of the association between  
104 fundamental and broad-scale realized thermal niche divergence.

105

106 *Methods*

107 We measured physiological traits for 304 individuals across 16 species from three islands (Fig. 1; see  
108 Supplementary Table 1 for species information). Throughout, we focus primarily on the eight Puerto  
109 Rican members of the *cristatellus* group, for two reasons. First, phylogenetic and natural history data  
110 indicate that these species diversified *in situ* and form four sister species pairs [46-48], with each pair  
111 representing an independent divergence in realized thermal niche based on the degree to which they  
112 occupy open versus shaded perches (which throughout we refer to as “warm niche” and “cool niche”  
113 species, respectively)[12, 41, 49, 50]. Second, we have detailed measurements of operative thermal  
114 environments in Puerto Rico to investigate performance consequences of physiological divergence.  
115 Experiments in Puerto Rico were conducted May 20 – June 20 2011, October 8-21 2011, and May 13-28  
116 2012 at the Mata de Plátano field station. On Jamaica, we sampled five of the six extant endemic species,  
117 plus the introduced *A. sagrei*. As with the Puerto Rican species, the endemic Jamaican anoles evolved *in*  
118 *situ* from a single colonization event [51]. Experiments in Jamaica occurred from February 25 – March 13  
119 2013 at Green Castle Estates, a privately owned farm and nature preserve in St. Mary Parish. Prior to  
120 experiments, lizards were kept individually in plastic cages (18 x 11 x 15 cm) with a wooden dowel perch  
121 on an approximately 12L:12D light schedule. Lizards were watered daily and fed crickets or Phoenix  
122 worms every other day. The exception was *A. acutus* from St. Croix, which were brought to Durham, NC  
123 and housed following Gunderson and Leal [52].

124 Heat tolerance ( $CT_{max}$ ) was measured following Leal and Gunderson [53], with N = 9-11  
125 individuals/species (Supplementary Table S1). Briefly, lizards (all captured three days prior to  
126 measurements) were warmed under a heat lamp while monitoring their body temperatures with a wire  
127 thermocouple probe placed inside the cloaca. Lizards were flipped onto their backs at one-degree body  
128 temperature intervals starting at 34°C, and  $CT_{max}$  was recorded as the body temperature at which they lost  
129 righting ability. Warming rates were very similar among species, with mean rates ranging from 1.8 to

130 2.6°C/min (Fig. S1). We modeled variation in log-transformed  $CT_{\max}$  among species using analysis of  
131 variance (ANOVA). Planned orthogonal contrasts were applied to test *a priori* predictions about  
132 divergence in  $CT_{\max}$  between sister species (in Puerto Rico) and divergence among sympatric,  
133 morphologically similar species (Puerto Rico and Jamaica).

134 Temperature-dependent sprint speeds were measured for thirteen species (N = 9-13  
135 individuals/species, Supplementary Table S1) following Gunderson and Leal [52]. Briefly, we analyzed  
136 high-speed video (120 frames/s) of lizards running up a 2 m wooden racetrack set at a 37° angle and  
137 marked with a line every 12.5 cm. Lizards were run 2-4 times at each temperature (two runs minimum,  
138 additional runs were added if the lizard stopped or jumped off of the track during a trial). Speed for a  
139 lizard at a given temperature was taken as the fastest 25 cm interval at that temperature [54, 55]. Puerto  
140 Rican lizards were run at five body temperatures in the following randomized order: 32, 22, 27, 17, and  
141 35°C. Conditions were the same for Jamaican lizards, except the 17°C temperature was excluded. All  
142 individuals were captured one day prior to the start of trials, and each temperature treatment was  
143 administered on a different day over five straight days (four days for Jamaican lizards). No animals were  
144 used for both heat tolerance and sprint performance. Target body temperatures were achieved by placing  
145 lizards into a calibrated chilling-heating incubator (Cole-Parmer©, Vernon Hills, IL, USA) for 30 min  
146 prior to a run [52].

147 The body temperature of maximum performance (the “optimal temperature,”  $T_{\text{opt}}$ ) was estimated  
148 for each individual [sensu 56]. Thermal performance curves are non-linear [57], and we initially fit two  
149 different non-linear models to the sprint data for each individual: a second order polynomial and a  
150 modified Gaussian function ( $P(T) = e^{-\frac{(T-T_{\text{opt}})^2}{2\sigma}}$ ) commonly used to fit performance curves for ectotherms  
151 [58], including *Anolis* sprinting [52, 59]. The Gaussian model provided relatively poor fits to the data  
152 (much higher residual standard errors than the second-order polynomial model (Fig. S2)). Therefore,  $T_{\text{opt}}$   
153 estimates from the second-order polynomial models were used in analyses.  $T_{\text{opt}}$  estimates were  
154 constrained such that  $T_{\text{opt}}$  had to occur within the range of experimental temperatures. This is a

155 conservative assumption that likely leads us to underestimate divergence in thermal physiology between  
156 species (see Results).  $T_{opt}$  data were heavily skewed (see Results), so we compared  $T_{opt}$  among species by  
157 assessing overlap in bootstrapped 95% confidence intervals (999 bootstrap replicates using the adjusted  
158 bootstrap percentile method due to the skew in our data [60]). Analyses were conducted with the “boot”  
159 and “boot.ci” functions, respectively, from the “boot” package in R [61].

160 We calculated the expected physiological performance of Puerto Rican species under natural  
161 warm (open xeric forest) and cool (shaded mesic forest) operative thermal regimes found on Puerto Rico  
162 [62]. Operative temperature distributions provide a quantitative description of a thermal environment  
163 integrating the physical features of the organism [63], representing the distribution of available body  
164 temperatures in a habitat. Operative temperature distributions came from a previous study [52] and were  
165 measured with copper lizard models [50] during the peak breeding season (summer) for Puerto Rican  
166 anoles [64]. Mean operative temperature in the mesic forest (28.9°C) is significantly cooler than that in  
167 the xeric forest (33.4°C) by 4.5°C [52].

168 We estimated two performance metrics under the different operative environments: 1) relative  
169 sprint performance capacity [52, 59, 63], and 2) probability of overheating (the percentage of operative  
170 temperature observations over  $CT_{max}$ ). For relative performance capacity, we generated species-level  
171 thermal performance curves using our sprint speed and  $CT_{max}$  data. The curves were a combination of two  
172 functions fit to the data: one describing performance below  $T_{opt}$ , and the other describing performance  
173 from  $T_{opt}$  to  $CT_{max}$  [52, 58, 59]. The former function was a second-order polynomial fit to the sprint data,

174 and the latter function took the form:  $P(T) = 1.0 - \left( \frac{T - T_{opt}}{CT_{max} - T_{opt}} \right)^2$  [52, 59]. Curves were scaled to relative

175 performance by setting sprint speed at  $T_{opt}$  to 1.0 (see Fig. S3 for fitted curves). Performance in each  
176 habitat was calculated by applying the curves to operative temperatures [52, 59, 63].

177 To compare rates of evolution of thermal physiology to ecomorphological traits involved in  
178 fundamental structural niche partitioning, we used a phylogenetic comparative approach. Rate of

179 evolution of heat tolerance ( $CT_{max}$ , with expanded species sampling, see Supplementary Table S1) was  
180 compared to rates for body size (snout-vent-length, or SVL), head length, femur length, and adhesive  
181 toepad width for the 4<sup>th</sup> hindtoe. We used the maximum clade credibility phylogeny and morphological  
182 data of Mahler *et al.* [47] for these analyses. Shape data (head length, femur length, and toepad width)  
183 consisted of residuals from phylogenetic regressions of each shape variable on SVL, a standard measure  
184 of lizard body size; these residuals were obtained using the `phyl.resid` function in `phytools` [65]. We used  
185 the approach of Adams [66] to conduct pairwise rate comparisons for all combinations of these five traits.  
186 We used likelihood ratio tests to compare a model in which the two traits could evolve at different rates to  
187 a model in which the traits were constrained to evolve at a single rate. Rates were estimated using species  
188 means of natural log-transformed values for all traits (such that rate variation is represented in terms of  
189 relative change in proportion to the trait mean; this is essential for comparison of traits measured using  
190 different units [66]). For these analyses, we co-estimated among-trait covariances (similar results were  
191 obtained with covariances fixed at zero).

192 To test for an association between fundamental and broad-scale realized thermal niche estimates,  
193 we conducted a phylogenetically-controlled correlation test between  $CT_{max}$  and geo-referenced Worldclim  
194 temperature data for each species based on collection localities. We used the first principal component  
195 axis from the *Anolis* climate temperature dataset of Algar and Mahler (2015), in which a phylogenetic  
196 principal component analysis (PCA) was used to condense the 11 Worldclim variables related to  
197 temperature (at 1 km resolution) into PCA axes (Supplementary Table S2). The first PC axis loaded  
198 positively for all variables related to temperature (e.g., mean annual temperature, mean maximum  
199 temperature; Supplementary Table S2), and can therefore be considered a composite estimate of habitat  
200 temperature. Phylogenetically-controlled correlation analyses between  $CT_{max}$  and individual Worldclim  
201 variables that loaded strongly with PC1 yielded similar results (Supplementary Figure S4).

202

203 *Results*



204 All Puerto Rican sister species pairs have diverged in at least one physiological trait ( $T_{\text{opt}}$ ,  $CT_{\text{max}}$ , or both),  
205 and in the predicted direction in all cases (Fig. 2).  $T_{\text{opt}}$  differed between the *A. evermanni/A. stratulus* and  
206 *A. cristatellus/A. cooki* species pairs (non-overlapping bootstrapped 95% CIs), but not between the *A.*  
207 *poncensis/A. gundlachi* or *A. pulchellus/A. krugi* species pairs (Fig. 2A). We note that the  $T_{\text{opt}}$  of *A. cooki*  
208 and *A. stratulus* were likely underestimated because most individuals had a  $T_{\text{opt}}$  of 35°C solely because  
209 that was our maximum test temperature.  $CT_{\text{max}}$  differed among Puerto Rican species ( $F_{7,72} = 42.74$ ;  $P <$   
210 0.001), with significant divergence in three of the four species pairs: *A. evermanni/A. stratulus*, *A.*  
211 *poncensis/A. gundlachi*, and *A. pulchellus/A. krugi* (all  $P < 0.001$ ), but not in the *A. cristatellus/A. cooki*  
212 species pair ( $P = 0.490$ ; Fig. 2B).

213         Physiological divergence influenced predicted performance in natural environments. In three of  
214 four species pairs, the cool niche species had higher predicted performance than the warm niche species  
215 in the shaded operative thermal environment, with mean performance advantages of 8-14% depending on  
216 the species pair and time of day (Fig. 3). The lone exception was the *A. pulchellus/A. krugi* species pair,  
217 for which both have similar performance estimates (Fig. 3G). Warm niche species tend to have a  
218 performance advantage in the open operative environment, particularly during midday hours (from 10:00-  
219 13:00; Fig. 3). The *A. cristatellus/A. cooki* species pair is the exception (Fig. 3D). However, *A. cooki*  
220 midday performance is likely underestimated due to our probable underestimation of its  $T_{\text{opt}}$  (see above).

221         No species are under threat of overheating in the shaded operative environment (Fig. 4A, C, E,  
222 G). However, all species have overheating risk in the open operative environment (Fig. 4B, D, F, H). For  
223 three of the four sister-species pairs (*A. stratulus/A. evermanni*, *A. poncensis/A. gundlachi*, and *A.*  
224 *pulchellus/A. krugi*), the cool niche species has a higher probability of overheating (Fig. 4B, F, H).  
225 Difference in overheating probability are particularly acute during midday, when cool niche species have  
226 overheating probabilities at least twice that of their warm niche counterparts (G-tests, all  $P < 0.05$ ). The  
227 *A. cristatellus/A. cooki* species pair, which had no divergence in  $CT_{\text{max}}$ , was the only exception (Fig. 4D).

228 Significant physiological divergence is also apparent among Jamaican species. Among species  
229 mean  $T_{\text{opt}}$  ranges from 29.5 to 34.6°C (Fig. 5A) while  $CT_{\text{max}}$  ranges from 35.8-41.5°C (Fig. 5B; ANOVA,  
230  $F_{3,36} = 13.6, P < 0.001$ ). Note that  $T_{\text{opt}}$  values of *A. grahami* and *A. opalinus* are likely underestimated due  
231 to our upper experimental limit of 35°C (see above).

232 Across Puerto Rico and Jamaica, sympatric species that share the same ecomorphology invariably  
233 differ in thermal physiology (Table 1). Thermal tolerance has evolved significantly more slowly than  
234 some, but not all, ecomorphological traits (Table 2).  $CT_{\text{max}}$  evolved significantly more slowly than body  
235 size (SVL;  $P < 0.001$ ) and relative limb length (femur;  $P = 0.029$ ), but did not differ from head length ( $P$   
236  $= 0.105$ ) or toepad width ( $P = 0.112$ ).

237  $CT_{\text{max}}$  was significantly positively correlated with geo-referenced climatic temperatures as  
238 represented by temperature principal component axis 1 ( $P = 0.006, r^2 = 0.45$ ; Fig. 6; see Supplementary  
239 Figure S4).

240

#### 241 *Discussion*

242 Abiotic niche evolution has been invoked as an important component of many evolutionary radiations,  
243 but the functional consequences of abiotic niche divergence are generally poorly known. We demonstrate  
244 that the Puerto Rican *Anolis* adaptive radiation is accompanied by physiological divergence in both heat  
245 tolerance and sensitivity to sub-lethal temperature variability. Warm-niche species (determined based on  
246 preference for open versus shaded perches) have either higher heat tolerance, higher optimal  
247 physiological temperatures, or both, compared to cool-niche species. The anoles of Jamaica also  
248 diversified physiologically, with species evolving essentially the full range of heat tolerances and optimal  
249 temperatures observed in their Puerto Rican counterparts (Fig. 5). These results highlight the possibility  
250 that physiological adaptation can be pervasive within evolutionary radiations, including those for which  
251 morphological divergence is widespread.

252 Repeated divergence in physiological traits under similar conditions is itself evidence of  
253 adaptation [67]. However, we provide more direct evidence of adaptation by estimating physiological  
254 performance of species in warm and cool operative environments on Puerto Rico. Cool niche species have  
255 higher predicted performance in shaded operative environments than their warm niche sister species in  
256 three of the four species pairs (Fig. 3), with the lone exception a species pair for which there was no  
257 divergence in  $T_{opt}$ . The pattern was less pronounced in the open operative environment, with warm niche  
258 species having a sizable performance advantage in only two species pairs (Fig. 3). However, the  
259 performance advantage for warm niche species becomes apparent when considering overheating risk.  
260 During midday hours in the warmer open environment, warm niche species in three of the four species  
261 pairs had less than half the overheating risk of cool niche species (Fig. 4). The sole exception was the *A.*  
262 *crisatellus/A. cooki* species pair, which exhibited no divergence in thermal tolerance (Fig. 2B). One  
263 implication of these results is that what appears to be modest physiological evolution ( $CT_{max}$  and  $T_{opt}$   
264 divergence of 2-4°C) can still have significant performance consequences.

265 The high community-level species diversity associated with *Anolis* and other adaptive radiations  
266 is facilitated by fine-scale resource partitioning [3]. Sympatric anoles are known to behaviorally partition  
267 thermal microhabitats [12, 13], and our findings indicate that this is facilitated by physiological  
268 divergence. When co-occurring anole species share the same fundamental structural niche (*i.e.*,  
269 ecomorphological microhabitat specialization), they invariably differ in thermal physiology (Table 1).  
270 This pattern is also maintained for introduced species: in Jamaica, the endemic trunk-ground species *A.*  
271 *lineatopus* is found in sympatry with the introduced trunk-ground species *A. sagrei*, and these species  
272 differ significantly in thermal tolerance (Table 1). These data highlight that, even in radiations for which  
273 morphological divergence is important in facilitating coexistence, physiological divergence can also play  
274 an important role, providing novel axes of diversification [68].

275 We found that thermal tolerance evolved more slowly than some ecomorphological traits (*i.e.*,  
276 SVL and femur length), and evolved at similar rates to others (*i.e.*, head length and toe-pad width; Table

277 2). In general, divergence along the fundamental thermal niche axis appears to have occurred more slowly  
278 than divergence along the fundamental structural niche axis, at least within the Puerto Rican and Jamaican  
279 anole radiations. This finding is inconsistent with a recent analysis that found that thermal niche,  
280 estimated as field body temperature, evolves more quickly than morphology in Caribbean anoles [43].  
281 Discrepancy between these results may be due to the different traits analyzed and/or the different species  
282 included, or the fact that that study estimated rates of absolute, rather than proportional, trait change (Fig.  
283 4). Regardless, the observation that physiology evolves slowly, with repeated divergence of relatively  
284 small magnitude, is consistent with our above suggestion that large changes in physiology are not  
285 necessary for divergence to be ecologically important. These results also indicate that caution should be  
286 exhibited when inferring the importance of traits based on comparisons of evolutionary rate estimates in  
287 the absence of data on how phenotypic changes map to performance change under natural conditions.

288 We found that fundamental and broad-scale realized thermal niche estimates were correlated, as  
289  $CT_{\max}$  was significantly positively correlated with geo-referenced temperature data across species (Fig. 6).  
290 Therefore, the realized thermal niches estimated in correlative ENM studies can capture some of the  
291 underlying variability in the fundamental thermal niche. Nonetheless, the majority of variability in the  
292 data (~55%) is left unexplained, and there are clear cases where realized and fundamental niche estimates  
293 diverge. For example, *A. lineatopus* and *A. gundlachi* have very similar  $CT_{\max}$  (mean  $CT_{\max}$  = 36.3°C and  
294 36.2°C, respectively), but occur in very different realized thermal niches (temperature PC1 = 0.14 and -  
295 2.66, respectively). Conversely, *A. opalinus* and *A. pulchellus* occur in very similar realized niches  
296 (temperature PC1 = -0.53 and -0.51, respectively) but have very different  $CT_{\max}$  (mean  $CT_{\max}$  = 37.5°C  
297 and 41.3°C, respectively). These results underscore the fact that broad-scale climatic conditions are not  
298 necessarily reflective of the underlying thermal biology of the organism being considered. Much of this  
299 discrepancy is likely due to behavioral thermoregulation, which allows taxa in the same geographic  
300 location to experience very different body temperatures and those in different geographic locations to  
301 experience very similar body temperatures [35, 69].

302           We have shown that fundamental thermal niche divergence is important in the Puerto Rican and  
303 Jamaican *Anolis* adaptive radiations. However, the importance of such divergence is likely not restricted  
304 to these islands. For example, species of *cybotes* group trunk-ground anoles in Hispaniola have diverged  
305 in thermal tolerance along an elevational gradient [45, 70], and variation in thermal physiology also  
306 occurs among non-Antillean anoles [71, 72]. Water loss rates also differ among anole species and  
307 populations [73-79]. In this context, our results suggest that physiological divergence may be as important  
308 as morphological divergence for diversification and coexistence in this classic radiation.

309           Achieving a mechanistic understanding of how evolutionary and ecological processes interact to  
310 promote the production and maintenance of biodiversity is a long-standing goal in evolutionary ecology.  
311 Given the reality of ongoing climate change, the need to understand these processes has become  
312 immediate, particularly with respect to temperature-dependent traits [80]. By focusing on physiological  
313 traits that link temperature to performance, we demonstrate that the evolution of thermal physiology can  
314 facilitate adaptive radiation by contributing to *in situ* performance tradeoffs and species co-existence.  
315 While our trait- and performance-based analyses would not be possible using the type of broad-scale  
316 climatic data used in ENMs studies alone, we find that climate-scale realized niche features correlate with  
317 fundamental niche features. Nonetheless, climatic data provide imperfect signal with respect to the  
318 evolution of functional traits, likely due to the ability of species to behaviorally augment their effective  
319 thermal environments. We suggest that deeper insights about the contribution of climatic niche  
320 divergence to evolutionary radiations will emerge when correlative niche data are used in tandem with  
321 experimental physiological studies within an integrative research program.

322

### 323 *Acknowledgements*

324 We thank J. Losos and two anonymous reviewers for helpful comments on this manuscript, A. Algar for  
325 help with data, D. Steinberg for field help and the El Verde and Mata de Plátano field stations, Ridge to  
326 Reef farm, and Green Castle Estates for logistical support. Permits were provided by the Puerto Rican

327 Departamento de Recursos Naturales y Ambientales, the St. Croix Division of Fish and Wildlife, and the  
328 Jamaican National Environment and Planning Agency.

329

330 **Funding.** This research was funded by NSF DDIG #1110570 to A.R.G.

331

332 **Ethics.** This research was conducted with the approval of the Duke University Animal Care and Use  
333 Committee permit #A106-10-04.

334

335 **Author Contributions.** A.R.G. and M.L. designed the study. A.R.G. collected the physiological data  
336 and conducted all statistical analyses that were not phylogenetically controlled. L.D.M. conducted all  
337 phylogenetic comparative analyses. A.R.G. led the writing with contributions from M.L. and L.D.M.

338

339 **Competing interests.** We have no competing interests.

340

341 **Data accessibility.** Physiological data are deposited in Dryad (DOI:

342 <https://doi.org/10.5061/dryad.688jj72>)

343

344

345

346

347

348

349

350

351

352 *References*

- 353 1. Hutchinson G.E. 1959 Homage to Santa Rosalia or why are there so many kinds of animals? *The*  
354 *American Naturalist* **93**(870), 145-159.
- 355 2. Simpson G.G. 1953 *Major features of evolution*. New York, Columbia University Press.
- 356 3. Schluter D. 2000 *The ecology of adaptive radiation*, Oxford University Press.
- 357 4. McPeck M.A. 2008 The ecological dynamics of clade diversification and community assembly.  
358 *The American Naturalist* **172**(6), E270-E284.
- 359 5. Grant P.R. 1999 *Ecology and evolution of Darwin's finches*, Princeton University Press.
- 360 6. Streebman J.T., Danley P.D. 2003 The stages of vertebrate evolutionary radiation. *Trends in*  
361 *Ecology & Evolution* **18**(3), 126-131.
- 362 7. Meyer A. 1993 Phylogenetic relationships and evolutionary processes in East African cichlid  
363 fishes. *Trends in Ecology & Evolution* **8**(8), 279-284.
- 364 8. Nosil P. 2012 *Ecological speciation*, Oxford University Press.
- 365 9. Chown S., Gaston K., Robinson D. 2004 Macrophysiology: large-scale patterns in physiological  
366 traits and their ecological implications. *Functional Ecology* **18**(2), 159-167.
- 367 10. Gaston K.J., Chown S.L., Calosi P., Bernardo J., Bilton D.T., Clarke A., Clusella-Trullas S.,  
368 Ghalambor C.K., Konarzewski M., Peck L.S. 2009 Macrophysiology: a conceptual reunification. *The*  
369 *American Naturalist* **174**(5), 595-612.
- 370 11. Kaspari M., Clay N.A., Lucas J., Yanoviak S.P., Kay A. 2015 Thermal adaptation generates a  
371 diversity of thermal limits in a rainforest ant community. *Global Change Biology* **21**(3), 1092-1102.
- 372 12. Rand A.S. 1964 Ecological distribution in anoline lizards of Puerto Rico. *Ecology* **45**, 745-752.
- 373 13. Ruibal R. 1961 Thermal relations of five species of tropical lizards. *Evolution* **15**(1), 98-111.
- 374 14. Wake D.B. 1987 Adaptive radiation of salamanders in Middle American cloud forests. *Annals of*  
375 *the Missouri Botanical Garden* **74**, 242-264.
- 376 15. Kozak K.H., Wiens J.J. 2007 Climatic zonation drives latitudinal variation in speciation  
377 mechanisms. *Proceedings of the Royal Society of London B: Biological Sciences* **274**(1628), 2995-3003.
- 378 16. Labra A., Pienaar J., Hansen T.F. 2009 Evolution of thermal physiology in *Liolaemus* lizards:  
379 adaptation, phylogenetic inertia, and niche tracking. *The American Naturalist* **174**(2), 204-220.
- 380 17. Bonino M.F., Azócar D.L.M., Tulli M.J., Abdala C.S., Perotti M.G., Cruz F.B. 2011 Running in  
381 cold weather: morphology, thermal biology, and performance in the southernmost lizard clade in the  
382 world (*Liolaemus lineomaculatus* section: Liolaemini: Iguania). *Journal of Experimental Zoology Part A:*  
383 *Ecological Genetics and Physiology* **315**(8), 495-503.
- 384 18. Pincheira-Donoso D. 2011 Predictable variation of range-sizes across an extreme environmental  
385 gradient in a lizard adaptive radiation: evolutionary and ecological inferences. *PloS One* **6**(12), e28942.
- 386 19. Kellermann V., van Heerwaarden B., Sgrò C.M., Hoffmann A.A. 2009 Fundamental evolutionary  
387 limits in ecological traits drive *Drosophila* species distributions. *Science* **325**(5945), 1244-1246.
- 388 20. Stillman J.H., Somero G.N. 2000 A comparative analysis of the upper thermal tolerance limits of  
389 eastern Pacific porcelain crabs, genus *Petrolisthes*: influences of latitude, vertical zonation, acclimation,  
390 and phylogeny. *Physiological and Biochemical Zoology* **73**(2), 200-208.
- 391 21. Dalziel A.C., Martin N., Laporte M., Guderley H., Bernatchez L. 2015 Adaptation and  
392 acclimation of aerobic exercise physiology in Lake Whitefish ecotypes (*Coregonus clupeaformis*).  
393 *Evolution* **69**(8), 2167-2186.
- 394 22. Potter K.A., Woods H.A., Pincebourde S. 2013 Microclimatic challenges in global change  
395 biology. *Global change biology* **19**, 2932-2939.
- 396 23. Losos J.B. 2009 *Lizards in an evolutionary tree: ecology and adaptive radiation of anoles*,  
397 University of California Press.
- 398 24. Knouft J.H., Losos J.B., Glor R.E., Kolbe J.J. 2006 Phylogenetic analysis of the evolution of the  
399 niche in lizards of the *Anolis sagrei* group. *Ecology* **87**(sp7), S29-S38.
- 400 25. Quintero I., Wiens J.J. 2013 Rates of projected climate change dramatically exceed past rates of  
401 climatic niche evolution among vertebrate species. *Ecology Letters* **16**(8), 1095-1103.



- 402 26. Warren D.L., Glor R.E., Turelli M. 2008 Environmental niche equivalency versus conservatism:  
403 quantitative approaches to niche evolution. *Evolution* **62**(11), 2868-2883.
- 404 27. Lawing A.M., Polly P.D., Hews D.K., Martins E.P., Collar D.C., Bronstein J.L. 2016 Including  
405 Fossils in Phylogenetic Climate Reconstructions: A Deep Time Perspective on the Climatic Niche  
406 Evolution and Diversification of Spiny Lizards (*Sceloporus*). *The American Naturalist* **188**(2), 000-000.
- 407 28. Peterson A.T., Soberón J., Pearson R.G., Anderson R.P., Nakamura M., Martinez-Meyer E.,  
408 Araújo M.B. 2011 *Ecological niches and geographic distributions*. Princeton, New Jersey, USA,  
409 Princeton University Press.
- 410 29. Guisan A., Thuiller W. 2005 Predicting species distribution: offering more than simple habitat  
411 models. *Ecology Letters* **8**(9), 993-1009.
- 412 30. Buckley L.B., Urban M.C., Angilletta M.J., Crozier L.G., Rissler L.J., Sears M.W. 2010 Can  
413 mechanism inform species' distribution models? *Ecology Letters* **13**(8), 1041-1054.
- 414 31. Alvarado-Serrano D.F., Knowles L.L. 2014 Ecological niche models in phylogeographic studies:  
415 applications, advances and precautions. *Molecular Ecology Resources* **14**(2), 233-248.
- 416 32. Kearney M., Porter W. 2009 Mechanistic niche modelling: combining physiological and spatial  
417 data to predict species' ranges. *Ecology letters* **12**(4), 334-350.
- 418 33. Warren D.L., Cardillo M., Rosauer D.F., Bolnick D.I. 2014 Mistaking geography for biology:  
419 inferring processes from species distributions. *Trends in Ecology & Evolution* **29**(10), 572-580.
- 420 34. Araújo M.B., Peterson A.T. 2012 Uses and misuses of bioclimatic envelope modeling. *Ecology*  
421 **93**(7), 1527-1539.
- 422 35. Bogert C.M. 1949 Thermoregulation in reptiles, a factor in evolution. *Evolution* **3**(3), 195-211.
- 423 36. Losos J.B., Jackman T.R., Larson A., de Queiroz K., Rodríguez-Schettino L. 1998 Contingency  
424 and determinism in replicated adaptive radiations of island lizards. *Science* **279**(5359), 2115-2118.
- 425 37. Williams E.E. 1983 Ecomorphs, faunas, island size, and diverse end points in island radiations of  
426 *Anolis*. In *Lizard ecology: studies of a model organism* (pp. 326-370. Cambridge, Harvard University  
427 Press.
- 428 38. Mahler D.L., Ingram T., Revell L.J., Losos J.B. 2013 Exceptional convergence on the  
429 macroevolutionary landscape in island lizard radiations. *Science* **341**(6143), 292-295.
- 430 39. Williams E.E. 1972 The origin of faunas. Evolution of lizard congeners in a complex island  
431 fauna: a trial analysis. *Evolutionary Biology* **6**, 47-89.
- 432 40. Heatwole H., Lin T.-H., Villalón E., Muñoz A., Matta A. 1969 Some aspects of the thermal  
433 ecology of Puerto Rican anoline lizards. *Journal of Herpetology* **3**, 65-77.
- 434 41. Huey R.B., Webster T.P. 1976 Thermal biology of *Anolis* lizards in a complex fauna: the  
435 *cristatellus* group on Puerto Rico. *Ecology* **57**, 985-994.
- 436 42. Losos J.B., Leal M., Glor R.E., de Queiroz K., Hertz P.E., Schettino L.R., Lara A.C., Jackman  
437 T.R., Larson A. 2003 Niche lability in the evolution of a Caribbean lizard community. *Nature* **424**(6948),  
438 542-545.
- 439 43. Hertz P.E., Arima Y., Harrison A., Huey R.B., Losos J.B., Glor R.E. 2013 Asynchronous  
440 evolution of physiology and morphology in *Anolis* lizards. *Evolution* **67**(7), 2101-2113.
- 441 44. Algar A.C., Mahler D.L. 2015 Area, climate heterogeneity, and the response of climate niches to  
442 ecological opportunity in island radiations of *Anolis* lizards. *Global Ecology and Biogeography*  
443 **doi:10.1111/geb.12327**.
- 444 45. Muñoz M.M., Stimola M.A., Algar A.C., Conover A., Rodriguez A.J., Landestoy M.A., Bakken  
445 G.S., Losos J.B. 2014 Evolutionary stasis and lability in thermal physiology in a group of tropical lizards.  
446 *Proceedings of the Royal Society B: Biological Sciences* **281**(1778), 20132433.
- 447 46. Nicholson K.E., Glor R.E., Kolbe J.J., Larson A., Blair Hedges S., Losos J.B. 2005 Mainland  
448 colonization by island lizards. *Journal of Biogeography* **32**(6), 929-938.
- 449 47. Mahler D.L., Revell L.J., Glor R.E., Losos J.B. 2010 Ecological opportunity and the rate of  
450 morphological evolution in the diversification of Greater Antillean anoles. *Evolution* **64**(9), 2731-2745.



- 451 48. Gamble T., Geneva A.J., Glor R.E., Zarkower D. 2014 *Anolis* sex chromosomes are derived from  
452 a single ancestral pair. *Evolution* **68**(4), 1027-1041.
- 453 49. Hertz P.E. 1992 Temperature regulation in Puerto Rican *Anolis* lizards: a field test using null  
454 hypotheses. *Ecology* **73**, 1405-1417.
- 455 50. Hertz P.E. 1992 Evaluating thermal resource partitioning by sympatric lizards *Anolis cooki* and *A.*  
456 *crystalinus*: a field test using null hypotheses. *Oecologia* **90**(1), 127-136.
- 457 51. Jackman T.R., Larson A., De Queiroz K., Losos J.B. 1999 Phylogenetic relationships and tempo  
458 of early diversification in *Anolis* lizards. *Systematic Biology* **48**(2), 254-285.
- 459 52. Gunderson A.R., Leal M. 2012 Geographic variation in vulnerability to climate warming in a  
460 tropical Caribbean lizard. *Functional Ecology* **26**(4), 783-793.
- 461 53. Leal M., Gunderson A.R. 2012 Rapid change in the thermal tolerance of a tropical lizard. *The*  
462 *American Naturalist* **180**(6), 815-822.
- 463 54. Huey R.B. 1983 Natural variation in body temperature and physiological performance in a lizard  
464 (*Anolis crystalinus*). In *Advances in herpetology and evolutionary biology: essays in honor of Ernest E*  
465 *Williams* (pp. 484-490).
- 466 55. Losos J.B. 1990 Ecomorphology, performance capability, and scaling of West Indian *Anolis*  
467 lizards: an evolutionary analysis. *Ecological Monographs* **60**, 369-388.
- 468 56. Logan M.L., Cox R.M., Calsbeek R. 2014 Natural selection on thermal performance in a novel  
469 thermal environment. *Proceedings of the National Academy of Sciences* **111**(39), 14165-14169.
- 470 57. Angilletta M.J. 2009 *Thermal adaptation: a theoretical and empirical synthesis*, Oxford  
471 University Press.
- 472 58. Deutsch C.A., Tewksbury J.J., Huey R.B., Sheldon K.S., Ghalambor C.K., Haak D.C., Martin  
473 P.R. 2008 Impacts of climate warming on terrestrial ectotherms across latitude. *Proceedings of the*  
474 *National Academy of Sciences* **105**(18), 6668-6672.
- 475 59. Huey R.B., Deutsch C.A., Tewksbury J.J., Vitt L.J., Hertz P.E., Pérez H.J.Á., Garland T. 2009  
476 Why tropical forest lizards are vulnerable to climate warming. *Proceedings of the Royal Society B:*  
477 *Biological Sciences* **276**(1664), 1939-1948.
- 478 60. Efron B. 1987 Better bootstrap confidence intervals. *Journal of the American Statistical*  
479 *Association* **82**(397), 171-185.
- 480 61. Canty A., Ripley B. 2017 boot: bootstrap R (S-Plus) functions. *R package v 13-20*.
- 481 62. Ewel J.J., Whitmore J.L. 1973 Ecological life zones of Puerto Rico and US Virgin Islands. In  
482 *Forest Service Research Paper ITF-18* (U.S. Department of Agriculture).
- 483 63. Hertz P.E., Huey R.B., Stevenson R. 1993 Evaluating temperature regulation by field-active  
484 ectotherms: the fallacy of the inappropriate question. *The American Naturalist* **142**, 796-818.
- 485 64. Gorman G.C., Licht P. 1974 Seasonality in ovarian cycles among tropical *Anolis* lizards. *Ecology*  
486 **55**, 360-369.
- 487 65. Revell L.J. 2012 phytools: an R package for phylogenetic comparative biology (and other things).  
488 *Methods in Ecology and Evolution* **3**(2), 217-223.
- 489 66. Adams D.C. 2013 Quantifying and comparing phylogenetic evolutionary rates for shape and  
490 other high-dimensional phenotypic data. *Systematic Biology* **62**, 181-192.
- 491 67. Harvey P.H., Pagel M.D. 1991 *The comparative method in evolutionary biology*, Oxford  
492 University Press.
- 493 68. Leal M., Fleishman L.J. 2002 Evidence for habitat partitioning based on adaptation to  
494 environmental light in a pair of sympatric lizard species. *Proceedings of the Royal Society of London*  
495 *Series B: Biological Sciences* **269**(1489), 351-359.
- 496 69. Huey R.B., Hertz P.E., Sinervo B. 2003 Behavioral drive versus behavioral inertia in evolution: a  
497 null model approach. *The American Naturalist* **161**(3), 357-366.
- 498 70. Hertz P.E., Huey R.B. 1981 Compensation for altitudinal changes in the thermal environment by  
499 some *Anolis* lizards on Hispaniola. *Ecology* **62**(3), 515-521.
- 500 71. Logan M.L., Huynh R.K., Precious R.A., Calsbeek R.G. 2013 The impact of climate change  
501 measured at relevant spatial scales: new hope for tropical lizards. *Global Change Biology* **19**, 3093-3102.

- 502 72. van Berkum F.H. 1986 Evolutionary patterns of the thermal sensitivity of sprint speed in *Anolis*  
503 lizards. *Evolution* **40**, 594-604.
- 504 73. Gunderson A.R., Siegel J., Leal M. 2011 Tests of the contribution of acclimation to geographic  
505 variation in water loss rates of the West Indian lizard *Anolis cristatellus*. *Journal of Comparative*  
506 *Physiology B* **181**(7), 965-972.
- 507 74. Hillman S., Gorman G. 1977 Water loss, desiccation tolerance, and survival under desiccating  
508 conditions in 11 species of Caribbean *Anolis*. *Oecologia* **29**(2), 105-116.
- 509 75. Sexton O.J., Heatwole H. 1968 An experimental investigation of habitat selection and water loss  
510 in some anoline lizards. *Ecology* **49**, 762-767.
- 511 76. Hertz P., Arce-Hernandez A., Ramirez-Vazquez J., Tirado-Rivera W., Vazquez-Vives L. 1979  
512 Geographical variation of heat sensitivity and water loss rates in the tropical lizard, *Anolis gundlachi*.  
513 *Comparative Biochemistry and Physiology Part A: Physiology* **62**(4), 947-953.
- 514 77. Hertz P.E. 1980 Responses to dehydration in *Anolis* lizards sampled along altitudinal transects.  
515 *Copeia* **1980**, 440-446.
- 516 78. Hillman S., Gorman G.C., Thomas R. 1979 Water loss in *Anolis* lizards: evidence for acclimation  
517 and intraspecific differences along a habitat gradient. *Comparative Biochemistry and Physiology Part A:*  
518 *Physiology* **62**(2), 491-493.
- 519 79. Dmi'el R., Perry G., Lazell J. 1997 Evaporative water loss in nine insular populations of the lizard  
520 *Anolis cristatellus* group in the British Virgin Islands. *Biotropica* **29**(1), 111-116.
- 521 80. Huey R.B., Kearney M.R., Krockenberger A., Holtum J.A., Jess M., Williams S.E. 2012  
522 Predicting organismal vulnerability to climate warming: roles of behaviour, physiology and adaptation.  
523 *Philosophical Transactions of the Royal Society B: Biological Sciences* **367**(1596), 1665-1679.
- 524
- 525
- 526
- 527
- 528
- 529
- 530
- 531
- 532
- 533
- 534
- 535
- 536
- 537

538

539

540

541 Table 1. Physiology differences between co-occurring species that occupy the same or similar structural  
542 niches (*i.e.*, share the same or similar ecomorphology). For  $CT_{max}$ , P-values are given based on one-way  
543 ANOVA with planned orthogonal contrasts. For  $T_{opt}$ , “\*” indicates that the bootstrapped 95% confidence  
544 intervals did not overlap, “N.S.” indicates no significant difference. “†” indicates that the species is an  
545 introduced member of the community.

546

547 Table 2. Estimated rates of evolution for heat tolerance ( $CT_{max}$ ) and morphological traits related to  
548 ecomorphological divergence. Rate estimates (bold) are in the diagonal of the matrix. Upper off-diagonals  
549 contain estimates of pairwise evolutionary covariances among traits, lower off-diagonals contain P-values  
550 for likelihood ratio test comparisons of 2-rate versus 1-rate models for each trait pair. P-values less than  
551 0.05 indicate support for a 2-rate model over a 1-rate model.

552

553

554

555

556

557

558

559

560 Table 1

| co-occurring species   |                               | ecomorph                 | physiological trait |                  |
|------------------------|-------------------------------|--------------------------|---------------------|------------------|
|                        |                               |                          | CT <sub>max</sub>   | T <sub>opt</sub> |
| <i>A. stratulus</i>    | <i>A. evermani</i>            | trunk-crown              | <0.001              | *                |
| <i>A. cristatellus</i> | <i>A. cooki</i>               | trunk-ground             | 0.490               | *                |
| <i>A. cristatellus</i> | <i>A. gundlachi</i>           | trunk-ground             | <0.001              | n.s.             |
| <i>A. krugi</i>        | <i>A. pulchellus</i>          | grass-bush               | <0.001              | n.s.             |
| <i>A. lineatopis</i>   | <i>A. grahami</i>             | trunk-ground/trunk-crown | <0.001              | n.s.             |
| <i>A. lineatopis</i>   | <i>A. sagrei</i> <sup>†</sup> | trunk-ground             | <0.001              | n.s.             |

561

562

563

564

565

566

567

568

569 Table 2.

570

|              | $CT_{\max}$     | SVL             | head length     | femur length    | toepad width    |
|--------------|-----------------|-----------------|-----------------|-----------------|-----------------|
| $CT_{\max}$  | <b>5.80E-05</b> | -4.90E-05       | -1.60E-05       | -5.50E-05       | -9.90E-06       |
| SVL          | <0.001          | <b>2.30E-03</b> | 8.90E-06        | -1.80E-05       | 2.70E-05        |
| head length  | 0.105           | <0.001          | <b>2.70E-05</b> | 1.30E-05        | -6.30E-06       |
| femur length | 0.029           | <0.001          | 0.001           | <b>1.40E-04</b> | 2.20E-05        |
| toepad width | 0.112           | <0.001          | 0.003           | 0.832           | <b>1.30E-04</b> |

571

572

573

574

575

576

577

578

579

580

581

582

583

584

585

586 Figure 1: Phylogenetic relationships of the species included in this study, along with the islands from  
587 which they were sampled.

588

589 Figure 2: Thermal physiology of four sister-species pairs of Puerto Rican anole. Each species pair is  
590 represented in alternating grey and white regions of the plot with warm niche species in red and cool  
591 niche species in blue. (A) Optimal sprint performance temperatures ( $T_{opt}$ ). (B) Heat tolerance limits  
592 ( $CT_{max}$ ). “\*”, significant difference between members of a species pair; N.S., no significant difference  
593 between members of a species pair. See Methods for analysis details.

594

595 Figure 3: Predicted relative physiological performance of sister-species pairs of Puerto Rican *Anolis*  
596 under shaded and open habitat operative thermal environments found on Puerto Rico during morning,  
597 midday, and afternoon/evening hours. Warm niche species in red, cool niche species in blue. (A, B) *A.*  
598 *stratulus/A. evermanni*, (C, D) *A. cooki/A. cristatellus*, (E, F) *A. poncensis/A. gundlachi* (G, H) *A.*  
599 *pulchellus/A. krugi*.

600

601 Figure 4: Predicted overheating probability of sister-species pairs of Puerto Rican *Anolis* under shaded  
602 and open habitat operative thermal environments found on Puerto Rico during morning, midday, and  
603 afternoon/evening hours. Warm niche species in red, cool niche species in blue. (A, B) *A. stratulus/A.*  
604 *evermanni*, (C, D) *A. cooki/A. cristatellus* (E, F), *A. poncensis/A. gundlachi*, (G, H) *A. pulchellus/A. krugi*.

605

606 Figure 5: Thermal physiology of endemic Jamaican anoles. (A) Optimal sprinting temperature ( $T_{opt}$ ).  
607 *Anolis valencienni* does not have a  $T_{opt}$  estimate because this species could not be induced to run. (B) Heat  
608 tolerance ( $CT_{max}$ ).

609

610 Figure 6: Relationship between  $CT_{max}$  and climate temperature PC1 from Algar and Mahler (2015).

611  
612  
613  
614  
615  
616  
617  
618  
619  
620  
621  
622  
623  
624  
625  
626  
627  
628  
629

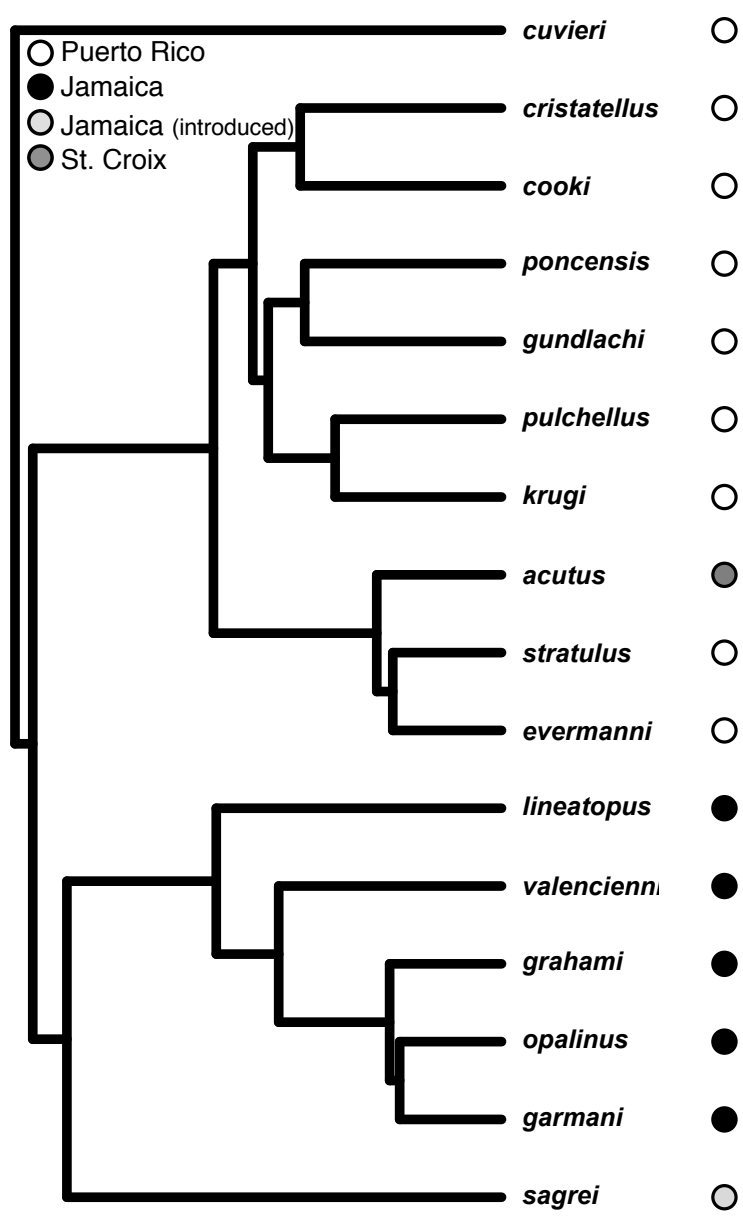

630  
631  
632  
633

Figure 1

634

635

636

637

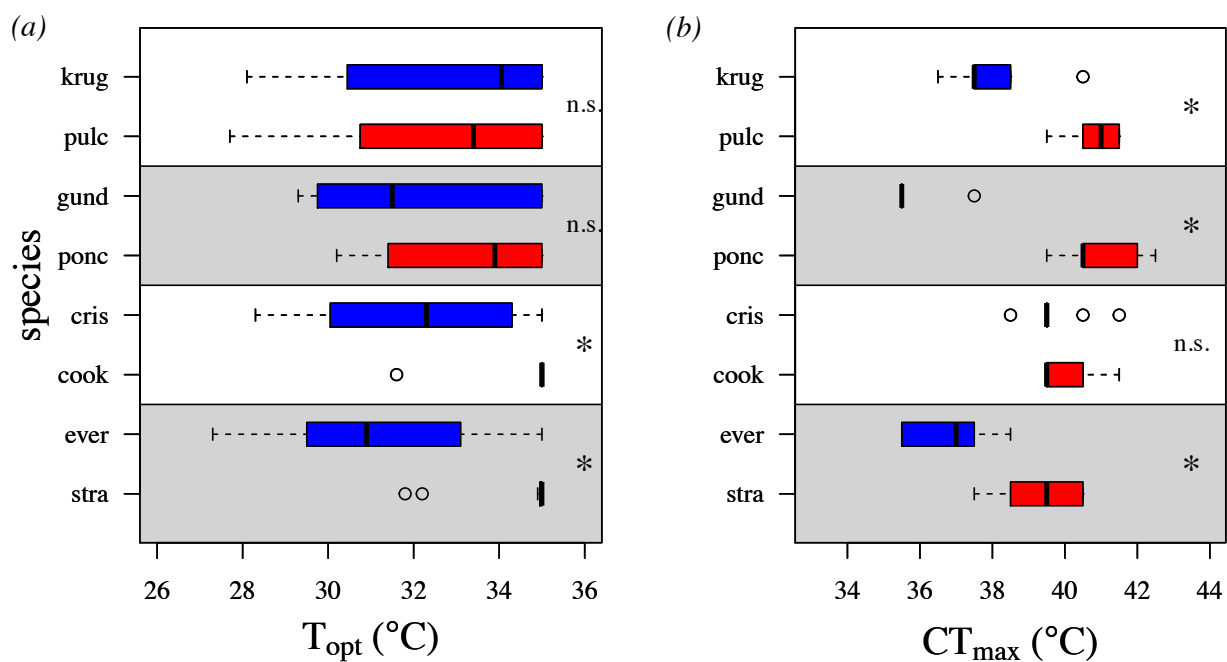

638 Figure 2.

639

640

641

642

643

644

645

646



647  
648  
649

650

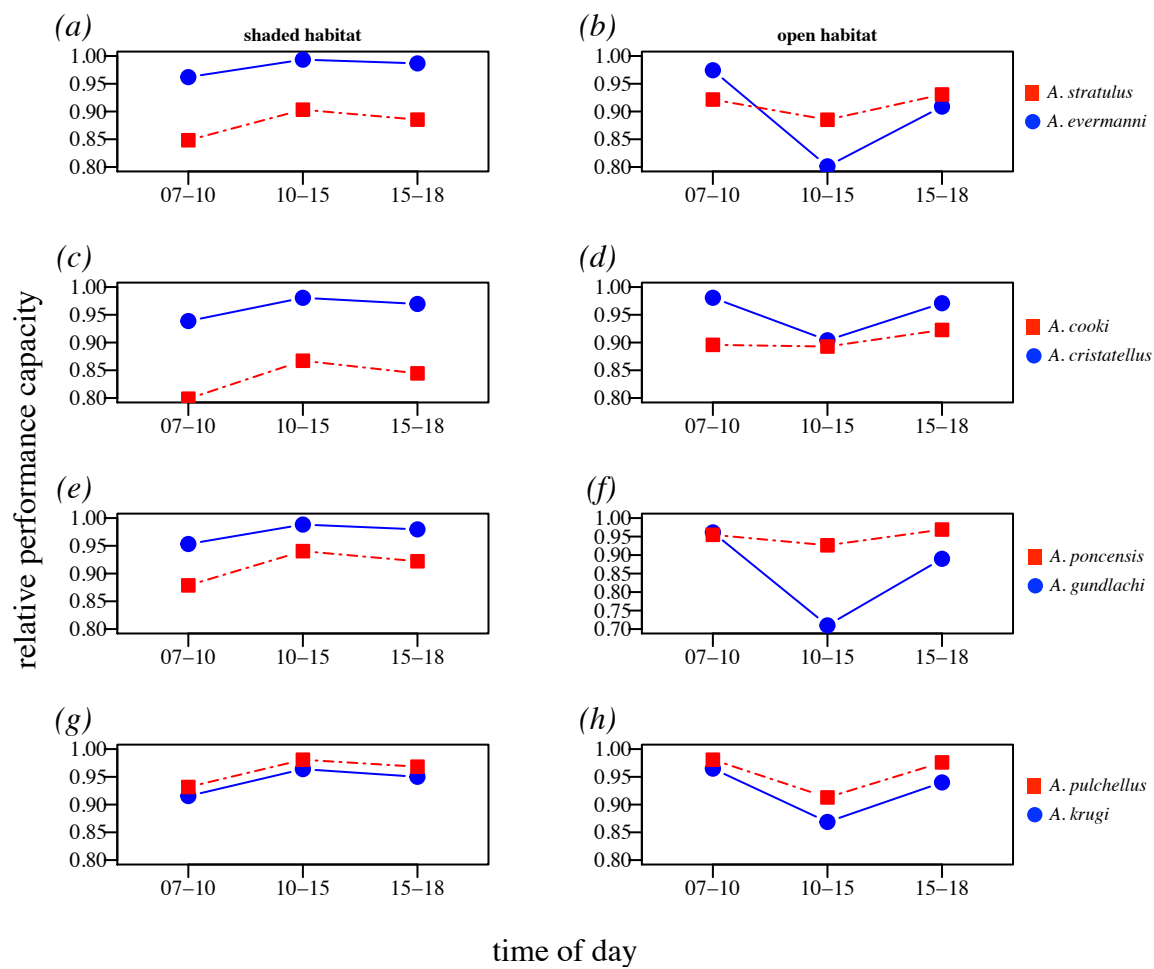

651

652

653

654

655

656

657

658

Figure 3

659

660

661

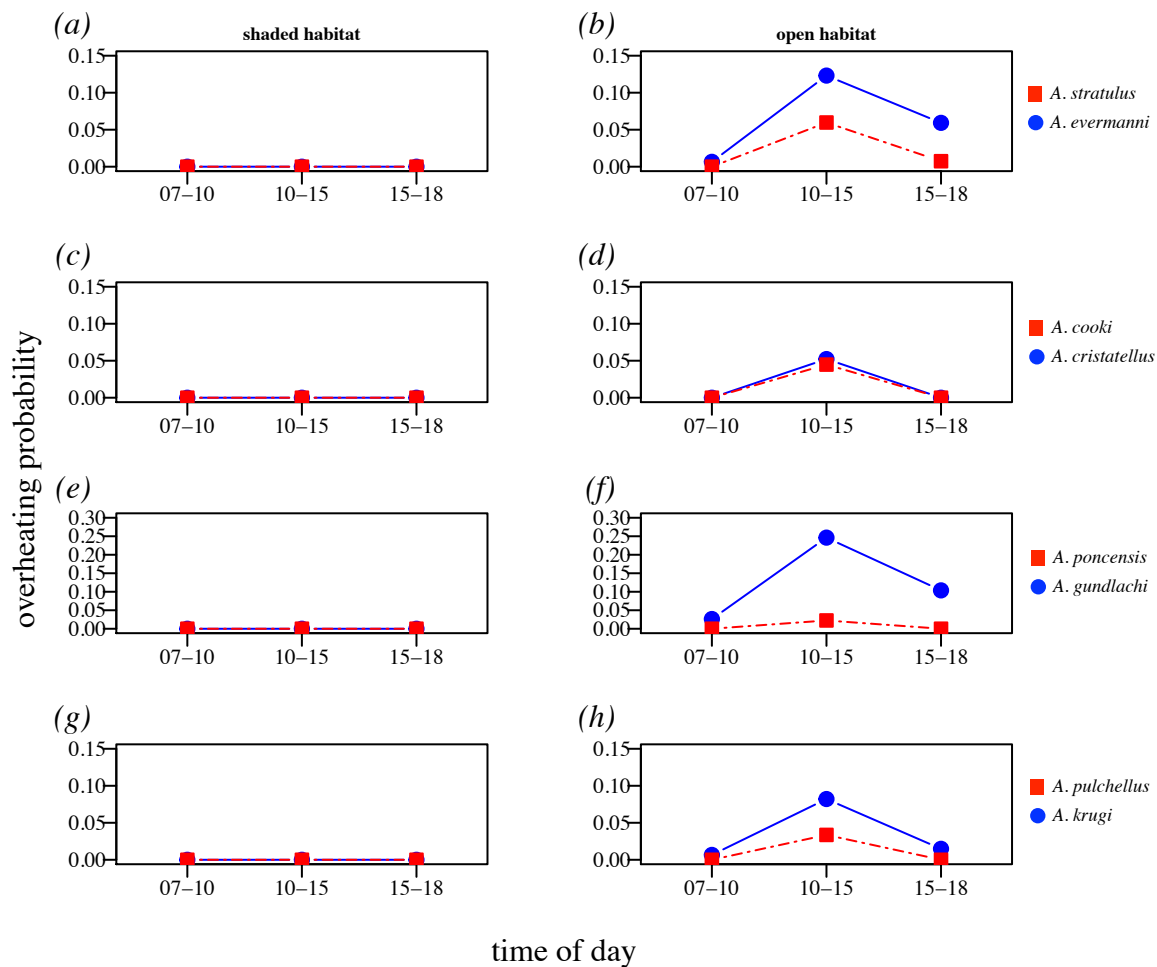

662

663

664

665

666

667 Figure 4

668

669

670

671

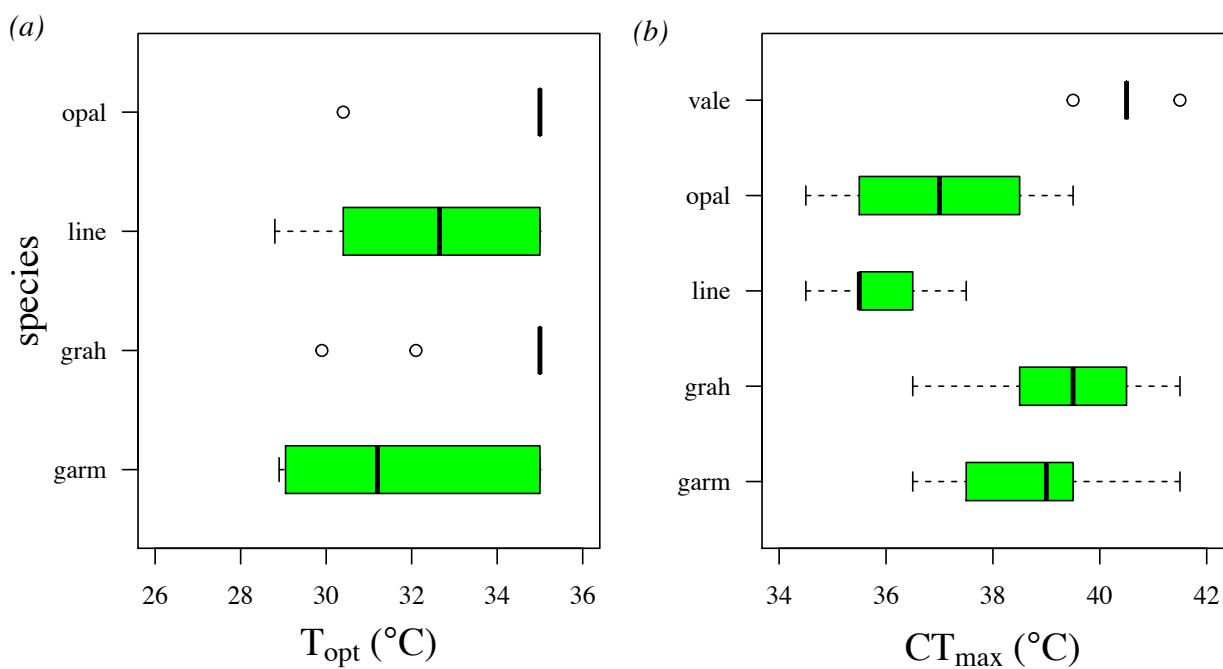

672

673

674

675 Figure 5

676

677

678

679

680

681

682

683

684

685

686

687

688

689

690

691

692

693

694

695

696

697

698

699

700

701 Figure 6.

702

703

704

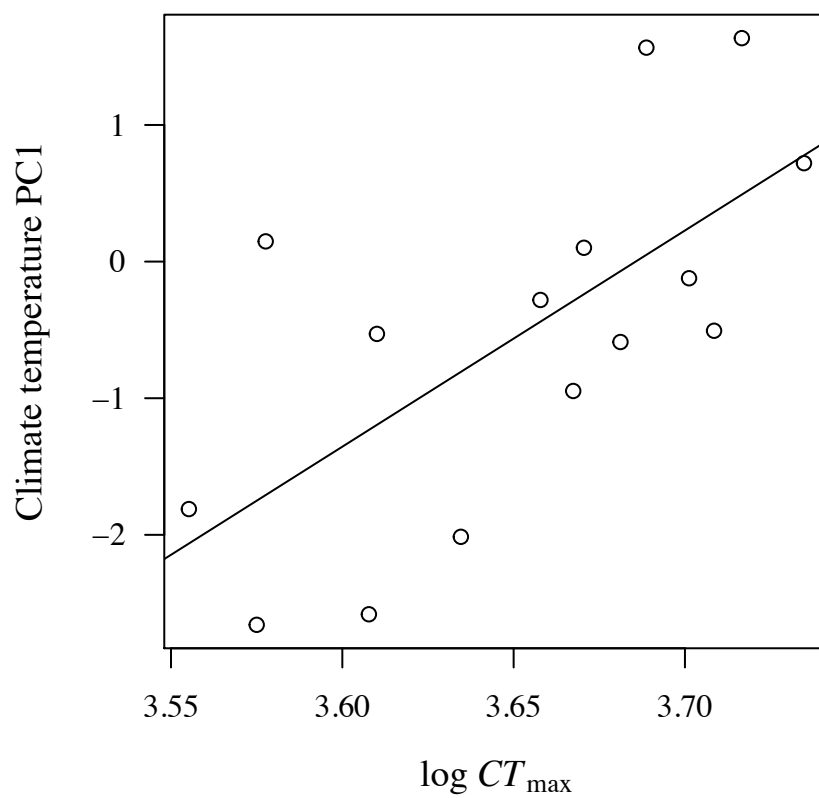

Source: http://biorxiv.org/content/10.1101/069294v3.full.pdf
